# Supplementary material for: Carbon emission from Western Siberian inland waters
Source: PubMed Central journal article supplement (PMC7864975; doi:10.1038/s41467-021-21054-1), 2021-02-05
Supplement: 41467_2021_21054_MOESM1_ESM.pdf [file 41467_2021_21054_MOESM1_ESM.pdf]

Supplementary Information:

## **Carbon emission from Western Siberian inland waters**

Jan Karlsson<sup>1\*</sup>, Svetlana Serikova<sup>1,2</sup>, Sergey N. Vorobyev<sup>3</sup>, Gerard Rocher-Ros<sup>1</sup>, Blaize Denfeld<sup>1,4</sup>, Oleg S. Pokrovsky<sup>3,5,6</sup>

<sup>1</sup>Climate Impacts Research Centre (CIRC), Department of Ecology and Environmental Science, Umeå University, Linnaeus väg 6, 901 87 Umeå, Sweden.

<sup>2</sup>Swedish Geotechnical Institute, Olaus Magnus väg 35, 581 93 Linköping, Sweden.

<sup>3</sup>BIO-GEO-CLIM Laboratory, Tomsk State University, Lenina 36, 634 050 Tomsk, Russia.

<sup>4</sup>Swedish University of Agricultural Sciences, Uppsala, Lennart Hjelm's väg 9, 75651 Uppsala, Sweden

<sup>5</sup>GET UMR 5563 CNRS, Geoscience and Environment, University of Toulouse, 14 Avenue Edouard Belin, 31400 Toulouse, France.

<sup>6</sup>Institute of Ecological Problems of the North, N. Laverov Federal Center for Integrated Arctic Research, Russian Academy of Sciences, Nab. Severnoi Dviny 23, 163 000 Arkhangelsk, Russia.

\*Correspondence to: J. Karlsson ([jan.p.karlsson@umu.se](mailto:jan.p.karlsson@umu.se)).

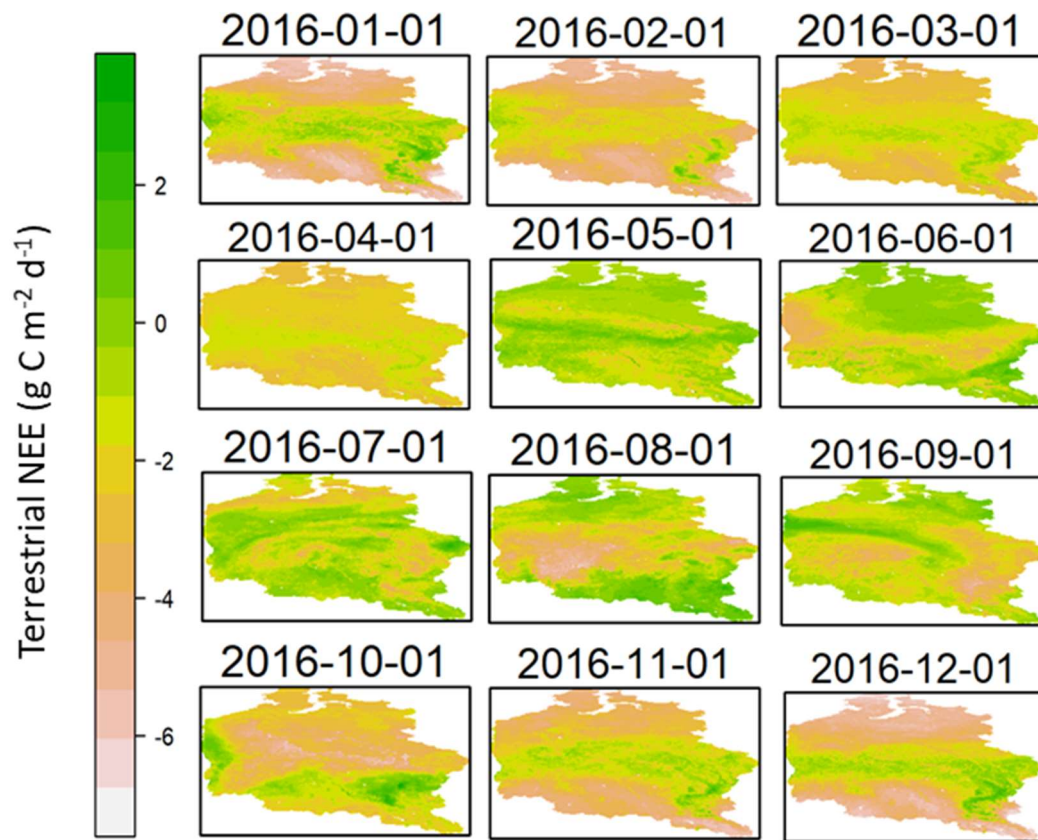

**Supplementary Figure 1.** Daily net ecosystem exchange (NEE) rate across Western Siberia for the first day of each month in 2016. Data for all days can be found in the data repository.

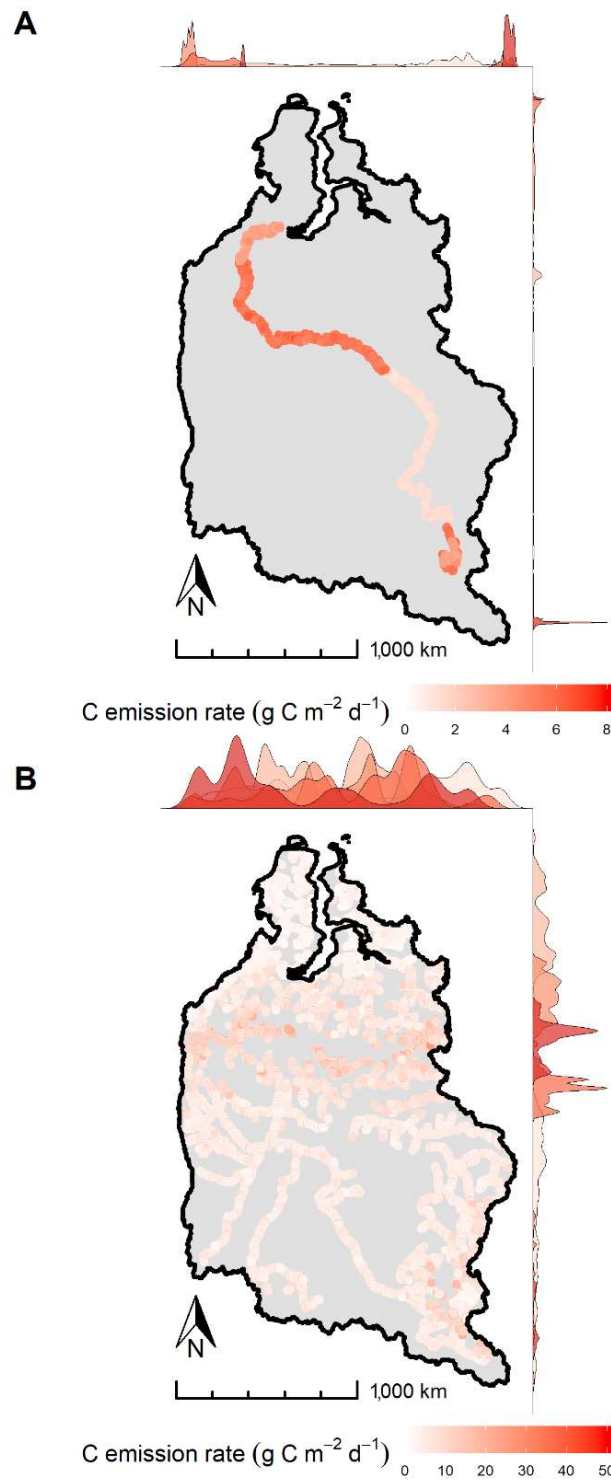

**Supplementary Figure 2.** Quantified C emission rates for the Ob' main channel (**A**) and for river network (**B**). The side panels represent color-coded density plots of the respective C emission rates across latitudes (vertical dimension) and longitudes (horizontal dimension).

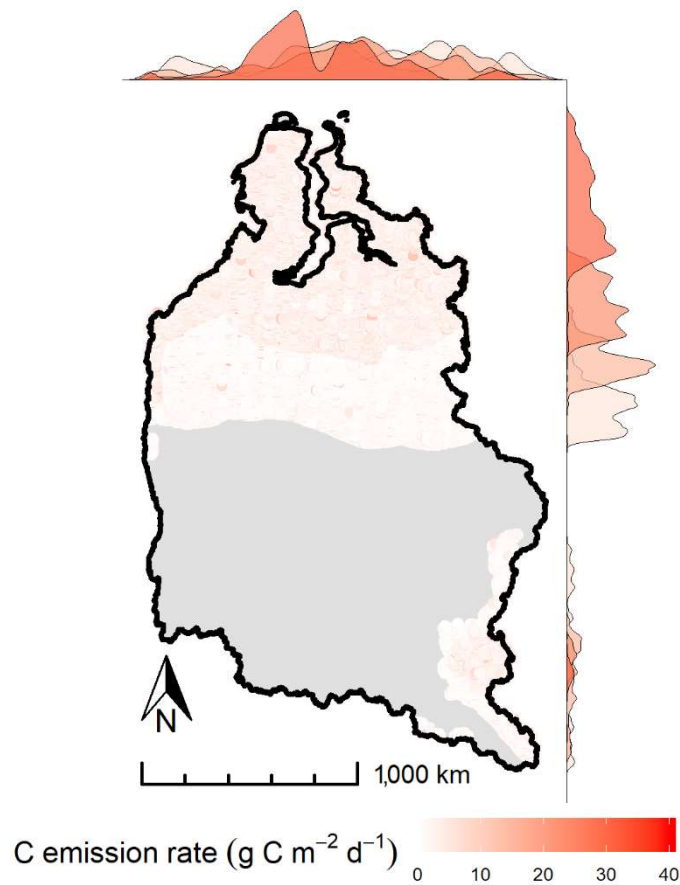

**Supplementary Figure 3.** Quantified C emission rates for permafrost-affected lakes. The side panels represent color-coded density plots of the respective C emission rates across latitudes (vertical dimension) and longitudes (horizontal dimension). Note that we removed 1 outlier to visually improve the graph. The data on lakes in the permafrost-free zone is not shown on the figure since it has been derived from Sabrekov et al. 2017<sup>1</sup>.

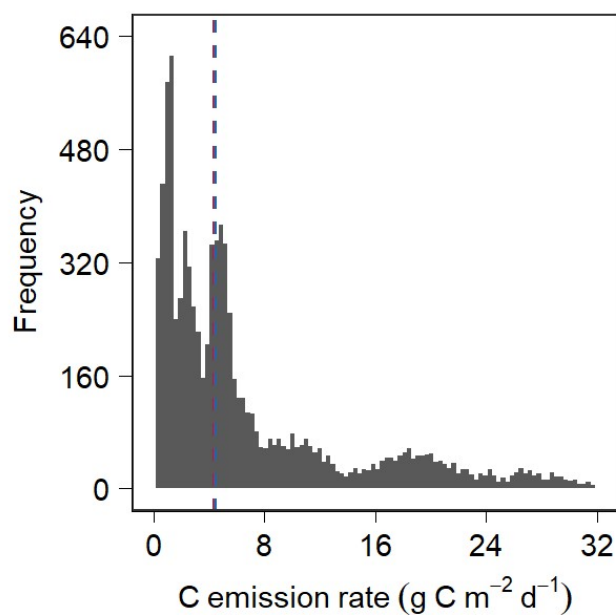

**Supplementary Figure 4.** Frequency distribution of estimated C emission rate for the Ob' main channel using Monte Carlo approach. The red line indicates the median of quantified C emission rate, whereas the blue line indicates the median of estimated C emission rate using Monte Carlo simulation.

**Supplementary Table 1.** Parameters of mean  $\pm$  s.d. of different variables across permafrost zones of Western Siberia. Dash stands for not applicable, since the data for permafrost-free lakes were derived from Sabrekov et al. 2017<sup>1</sup>.

|                                                                              | Permafrost zone |                 |                   |                 |                 |
|------------------------------------------------------------------------------|-----------------|-----------------|-------------------|-----------------|-----------------|
|                                                                              | Permafrost-free | Isolated        | Sporadic          | Discontinuous   | Continuous      |
| <b>Ob' main channel</b>                                                      |                 |                 |                   |                 |                 |
| CO <sub>2</sub> emission rate (g C m <sup>-2</sup> (water) d <sup>-1</sup> ) | 1.31 $\pm$ 0.89 | 5.39 $\pm$ 0.67 | 5.41 $\pm$ 0.69   | 3.82 $\pm$ 1.14 | 3.82 $\pm$ 1.13 |
| C yield (g C m <sup>-2</sup> (land) yr <sup>-1</sup> )                       | 0.02            | 0.59            | 0.11              | 0.15            | 0.008           |
| <b>Rivers &gt; 90 m wide</b>                                                 |                 |                 |                   |                 |                 |
| CO <sub>2</sub> emission rate (g C m <sup>-2</sup> (water) d <sup>-1</sup> ) | 4.59 $\pm$ 3.70 | 7.45 $\pm$ 5.70 | 11.06 $\pm$ 14.39 | 5.88 $\pm$ 7.69 | 2.58 $\pm$ 1.72 |
| C yield (g C m <sup>-2</sup> (land) yr <sup>-1</sup> )                       | 3.52            | 2.78            | 6.57              | 4.89            | 2.26            |
| <b>Lakes &gt; 0.01 km<sup>2</sup> area</b>                                   |                 |                 |                   |                 |                 |
| C emission rate (g C m <sup>-2</sup> (water) d <sup>-1</sup> )               | -               | 1.11 $\pm$ 1.36 | 0.77 $\pm$ 1.38   | 2.76 $\pm$ 3.67 | 2.83 $\pm$ 3.13 |
| C yield (g C m <sup>-2</sup> (land) yr <sup>-1</sup> )                       | 3.79            | 8.95            | 7.58              | 34.2            | 20.4            |
| Land area (km <sup>2</sup> )                                                 | 2,278,980       | 343,473         | 360,404           | 357,125         | 303,307         |

**Supplementary Table 2.** Monthly net ecosystem exchange (NEE) of Western Siberia. The mean and s.d. represent a mean and 1 s.d. of NEE rate aggregated per month across entire Western Siberia (across 71,280 of 9 x 9 km cells covering the region), whereas the monthly NEE values are reported as a sum of products' sum of each 71,280 individual cells' NEE rates and respective cells' resolution. The NEE data was extracted from NASA SMAP L4 Global Daily 9 km EASE-Grid Carbon Net Ecosystem Exchange, Version 4 product (<https://nsidc.org/data/SPL4CMDL>)<sup>2</sup>.

| Month     | NEE                                                |                                                    |                                   |
|-----------|----------------------------------------------------|----------------------------------------------------|-----------------------------------|
|           | Mean (g C m <sup>-2</sup> (land) d <sup>-1</sup> ) | s.d. (g C m <sup>-2</sup> (land) d <sup>-1</sup> ) | Total (Tg C month <sup>-1</sup> ) |
| January   | 0.54                                               | 0.001                                              | 61.56                             |
| February  | 0.59                                               | 0.006                                              | 62.84                             |
| March     | 0.64                                               | 0.016                                              | 73.26                             |
| April     | 0.61                                               | 0.056                                              | 67.72                             |
| May       | -0.17                                              | 0.077                                              | -20.17                            |
| June      | -1.28                                              | 0.087                                              | -140.60                           |
| July      | -1.88                                              | 0.112                                              | -213.38                           |
| August    | -0.74                                              | 0.123                                              | -198.18                           |
| September | -0.23                                              | 0.049                                              | -26.06                            |
| October   | 0.26                                               | 0.023                                              | 30.32                             |
| November  | 0.44                                               | 0.004                                              | 48.77                             |
| December  | 0.48                                               | 0.002                                              | 55.30                             |

**Supplementary Table 3.** Annual flow-weighted DOC and DIC export by the Ob', Pur and Taz river basins. DOC flux for Ob' is based on Kaiser et al. 2017<sup>3</sup> while DIC flux for Ob' is derived from Tank et al. 2012 (mean for the period of 2003-2009). DOC fluxes for Pur and Taz are based on Pokrovsky et al. 2015<sup>4,5</sup> (mean over the period of 2013-2014), whereas DIC fluxes for these rivers are derived from Gordeev et al. 1996<sup>6</sup> (both are quantified based on discharge data from 1971-1980).

| River | DOC flux              | DIC flux              | C flux                |
|-------|-----------------------|-----------------------|-----------------------|
|       | Tg C yr <sup>-1</sup> | Tg C yr <sup>-1</sup> | Pg C yr <sup>-1</sup> |
| Ob'   | 3.91                  | 5.9                   | 0.0098                |
| Pur   | 0.23                  | 0.17                  | 0.0004                |
| Taz   | 0.28                  | 0.58                  | 0.0008                |

**Supplementary Table 4.** Parameters of linear regression between ice-free season length and latitude.

| Predictor variable      | Dependent variable           |                          |
|-------------------------|------------------------------|--------------------------|
|                         | Ice-free season length, days |                          |
|                         | (1)                          | (2)                      |
| River latitude, °N      | -6.53*** (0.07)              |                          |
| Lake latitude, °N       |                              | -6.31*** (0.08)          |
| Intercept               | 578.71*** (4.63)             | 536.47*** (5.27)         |
| Observations            | 116                          | 228                      |
| R <sup>2</sup>          | 0.99                         | 0.96                     |
| Adjusted R <sup>2</sup> | 0.99                         | 0.96                     |
| Residual Std. Error     | 2.22 (df = 114)              | 2.36 (df = 226)          |
| F Statistics            | 7,899.51*** (df = 1;114)     | 6,012.09*** (df = 1;226) |
| Note:                   |                              | *** <i>p</i> <0.01       |

## References

- 1 Sabrekov, A. F. *et al.* Variability in methane emissions from West Siberia's shallow boreal lakes on a regional scale and its environmental controls. *Biogeosciences* **14**, 3715-3742, doi:10.5194/bg-14-3715-2017 (2017).
- 2 Kimball, J. S., Jones, L. A., Kundig, T. & Reichle, R. SMAP L4 Global Daily 9 km EASE-Grid Carbon Net Ecosystem Exchange, Version 4. doi:<https://doi.org/10.5067/9831N0JGVAF6> (2018).
- 3 Kaiser, K., Canedo-Oropeza, M., McMahon, R. & Amon, R. M. W. Origins and transformations of dissolved organic matter in large Arctic rivers. *Scientific Reports* **7**, doi:10.1038/s41598-017-12729-1 (2017).
- 4 Pokrovsky, O. S. *et al.* Permafrost coverage, watershed area and season control of dissolved carbon and major elements in western Siberian rivers. *Biogeosciences* **12**, 6301-6320, doi:10.5194/bg-12-6301-2015 (2015).
- 5 Tank, S. E. *et al.* A land-to-ocean perspective on the magnitude, source and implication of DIC flux from major Arctic rivers to the Arctic Ocean. *Global Biogeochemical Cycles* **26**, doi:10.1029/2011gb004192 (2012).
- 6 Gordeev, V. V., Martin, J. M., Sidorov, I. S. & Sidorova, M. V. A reassessment of the Eurasian river input of water, sediment, major elements, and nutrients to the Arctic Ocean. *American Journal of Science* **296**, 664-691, doi:10.2475/ajs.296.6.664 (1996).
